1 **A peptide pair coordinates regular ovule initiation**  
2 **patterns with seed number and fruit size**

3

4 **Nozomi Kawamoto<sup>1,2</sup>, Dunia Pino Del Carpio<sup>1,3</sup>, Alexander Hofmann<sup>4</sup>, Yoko**  
5 **Mizuta<sup>5,6</sup>, Daisuke Kurihara<sup>6,7</sup>, Tetsuya Higashiyama<sup>6</sup>, Naoyuki Uchida<sup>6</sup>, Keiko U.**  
6 **Torii<sup>6,8,9</sup>, Lucia Colombo<sup>10</sup>, Georg Groth<sup>2,3</sup>, and Rüdiger Simon<sup>1,2\*</sup>**

7

8 <sup>1</sup>Institute for Developmental Genetics, Heinrich-Heine University Düsseldorf, University  
9 Street 1, D-40225 Düsseldorf, Germany

10 <sup>2</sup>Cluster of Excellence on Plant Sciences (CEPLAS)

11 <sup>3</sup>Agriculture Research division, Agriculture Victoria, Australia

12 <sup>4</sup>Institute of Biochemical Plant Physiology, Heinrich-Heine University Düsseldorf,  
13 University Street 1, D-40225 Düsseldorf, Germany

14 <sup>5</sup>Institute for Advanced Research (IAR), Nagoya University, Furo-cho,  
15 Chikusa-ku, Nagoya, Aichi 464-8601, Japan

16 <sup>6</sup>Institute of Transformative Bio-Molecules (ITbM), Nagoya University, Furo-cho,

17 Chikusa-ku, Nagoya, Aichi 464-8601, Japan

18 <sup>7</sup>JST, PRESTO, Furo-cho, Chikusa-ku, Nagoya, Aichi 464-8601, Japan

19 <sup>8</sup>Department of Biology, University of Washington, Seattle, WA, 98195 USA

20 <sup>9</sup>Howard Hughes Medical Institute and Department of Molecular Biosciences,

21 University of Texas at Austin, Austin, TX, 78712 USA

22 <sup>10</sup>Università degli studi di Milano, Italy

23 \*Corresponding author: Rüdiger Simon, [ruediger.simon@hhu.de](mailto:ruediger.simon@hhu.de)

24

25 **Abstract**

26 Ovule development in *Arabidopsis thaliana* involves pattern formation which ensures

27 that ovules are regularly arranged in the pistils to reduce competition for nutrients and

28 space. Mechanisms underlying pattern formation in plants, such as phyllotaxis, flower

29 morphogenesis or lateral root initiation, have been extensively studied, and genes

30 controlling the initiation of ovules have been identified. However, how a regular spacing

31 of ovules is achieved is not known. Using natural variation analysis combined with

32 quantitative trait locus analysis, we found that the spacing of ovules in the developing

33 fruits is controlled by two secreted peptides, EPFL2 and EPFL9 (also known as  
34 Stomagen), and their receptors from the ERECTA (ER) family that act from the carpel  
35 wall and the placental tissue. We found that a signalling pathway controlled by EPFL9  
36 acting from the carpel wall through the LRR-receptor kinases ER, ERL1 and ERL2  
37 promotes fruit growth. Regular spacing of ovules depends on EPFL2 expression in the  
38 carpel wall and in the inter-ovule spaces, where it acts through ERL1 and ERL2. Loss of  
39 EPFL2 signalling results in shorter fruits and irregular spacing of ovules or even ovule  
40 twinning. The EPFL2 expression pattern between ovules is under negative-feedback  
41 regulation by auxin, which accumulates in the arising ovule primordia. We propose that  
42 the auxin-EPFL2 signalling module evolved to control the initiation and regular,  
43 equidistant spacing of ovule primordia, which serves to minimise competition between  
44 developing seeds. Together, EPFL2 and EPFL9 coordinate ovule patterning and thereby  
45 seed number with fruit growth through a set of shared receptors.

46

## 47 **Introduction**

48 Plants have evolved diverse strategies to maximise their reproductive success, which

49 enables them to transfer genetic resources to subsequent generations. To produce floral  
50 organs at an appropriate time, plants integrate various environmental cues to induce  
51 flowering<sup>1,2</sup>. When this process is triggered in *Arabidopsis thaliana*, each flower  
52 produces four sepals, four petals, six stamens and one pistil which originates from the  
53 fusion of two carpels. The ovules, which contain the egg cells, reside in the pistil and are  
54 derived from another meristematic tissue within the pistil termed placenta<sup>2,3</sup>, where they  
55 are almost simultaneously initiated in two parallel rows within each carpel. The number  
56 of ovules per flower determines the maximum number of seeds that a single flower can  
57 generate. At the transition from flower developmental stage 8 to 9 as defined by Smyth et  
58 al.<sup>4</sup>, ovules are initiated from the placenta with regular 2 to 4 cell intervals. This regularity  
59 enables plants to reduce competition between adjacent ovules or the developing seeds  
60 after fertilization; disruption of this regular pattern could result in the formation of small  
61 or large, or closely juxtaposed ovules, which would bias reproductive success depending  
62 on random positional effects. During further growth, the pistil forms a silique that  
63 encloses the developing seeds until they reach maturity and are shed. Thus, the overall  
64 size of the silique places a natural constraint on the number of seeds that can be formed,

65 their final size, or both, and silique growth needs to be tightly coordinated with the ovule  
66 initiation process. Indeed, final fruit length is normally well correlated with the number of  
67 seeds grown within it<sup>5</sup>. However, how this coordination is achieved, and how ovules are  
68 initiated strictly at very regular intervals remains to be investigated.

69 Successful ovule formation is by itself a prerequisite for seed production and has  
70 therefore attracted widespread research interest, so that mechanistically, the process of  
71 ovule primordia formation is at least partially understood and the functions of key  
72 regulatory genes have been identified<sup>2</sup>. Ovule primordia originate from periclinal  
73 divisions in subepidermal cell layers of the placenta, and their formation requires the  
74 coordinated activity of auxin and cytokinin signalling pathways. Here, PIN1 acts as the  
75 main auxin transporter, and *pin1-5* mutants develop pistils with a reduced ovule number<sup>6</sup>.

76 The expression of *PIN1* is further modulated by cytokinin. An increase in cytokinin levels  
77 due to loss of cytokinin degrading enzymes causes an increase in ovule number per  
78 flower, possibly by upregulation of PIN1 levels<sup>7</sup>. Other phytohormones involved are  
79 Gibberellins (GAs) and Brassinolide (BR), which act antagonistically to restrict (GA) or  
80 promote (BR) ovule formation via regulation of cytokinin signalling<sup>8,9</sup>. In response to

81 auxin, the transcription factor MONOPTEROS/AUXIN RESPONSE FACTOR5  
82 (MP/ARF5) is activated and regulates the expression of the transcription factors  
83 AINTEGUMENTA (ANT), CUP SHAPED COTYLEDON1 (CUC1) and CUC2 in ovule  
84 primordia and the boundary domains between ovules, respectively<sup>10</sup>. A knockdown of  
85 *CUC1* expression in *cuc2* or *cuc2;ant* mutant backgrounds reduces ovule numbers,  
86 whereas *cuc2;cuc3* double mutants give rise to fused ovules, indicating that the  
87 generation of interorgan boundaries depends on partially overlapping CUC functions.  
88 CUC1 and CUC2 affect *PIN1* expression via control of cytokinin inactivating enzymes<sup>7</sup>.  
89 Overall, the process of ovule formation strongly resembles that of other lateral organs,  
90 where initials are first defined by local auxin accumulation<sup>10</sup>. The distance between ovule  
91 primordia determines ultimately the total number of seeds that can be generated on a  
92 single flower, if silique length is constant. A recent genome wide association study  
93 identified *NEW ENHANCER OF ROOT DWARFISM1* (*NERD1*) as a positive regulator of  
94 ovule number, however, the *nerd1* mutants generated drastically shortened siliques,  
95 suggesting that *NERD1* does not play a specific role in controlling the distance between  
96 arising ovules<sup>11</sup>. Alonso-Blanco and colleagues previously proposed the *ERECTA* (*ER*)

97 locus of *Arabidopsis* to be a major determinant of several life history traits, among them  
98 fruit size and ovule number per flower<sup>5</sup>. The *er* mutants are characterised by a  
99 short-fruit phenotype and a compact shoot architecture in the Landsberg background<sup>12</sup>.  
100 The *ER* gene encodes a leucine rich repeat (LRR) receptor kinase which regulates pattern  
101 formation in multiple developmental pathways, including stomata development, vascular  
102 architecture and leaf margin serration<sup>13</sup>; the related ER-family genes *ERECTA-LIKE1*  
103 (*ERL1*) and *ERL2* contribute partially overlapping functions with ER<sup>14-17</sup>. Ligands for  
104 ER-family receptors belong to the evolutionary conserved EPIDERMAL PATTERNING  
105 FACTOR (EPF)/EPF-LIKE (EPFL)-family of cysteine-rich secreted peptides, with 11  
106 members in *Arabidopsis*<sup>18</sup>. Some EPF/EPFL peptides act antagonistically in stomata  
107 development by competing for interaction with the receptor complex, and consequently  
108 trigger different signalling readouts in the stomata lineage<sup>18-26</sup>. For example, while EPF2  
109 activates the MAPK cascade upon binding to the ER/ERL1/TMM receptor complex to  
110 restrict entry of epidermal cells into the stomatal lineage, EPFL9/STOMAGEN competes  
111 for binding and interacts preferentially with ER/ERL1<sup>25</sup>. Because EPFL9 binding does  
112 not induce MAPK activation, SPCH is not degraded, resulting in the production of

113 supernumerous stomata<sup>27,28</sup>. Beyond epidermal cell specification, EPFL2 was found to  
114 interact with ER, ERL1 and ERL2 to promote leaf margin tooth growth via regulation of  
115 auxin responses<sup>17</sup>.

116 We started to investigate the underlying mechanisms of regular ovule initiation by asking  
117 whether the spacing of ovules is largely genetically or environmentally controlled. A  
118 natural variation analysis combined with QTL analysis of candidate lines first identified  
119 *ER* and *EPFL2* as key loci that control the spacing of ovules in the developing fruit.  
120 Detailed genetic and gene function analyses further revealed that at least two separate  
121 pathways involving members of the ER and EPF families control regular spacing of  
122 ovules, together with fruit size. We propose that the tight coupling of fruit growth with  
123 ovule initiation at regularly spaced intervals depends on the negative feedback regulation  
124 between EPFL2 and auxin. The output of this patterning module would safeguard a low  
125 variance between ovules as a conservative bet hedging approach.

126

## 127 **Results**

### 128 **ER regulates the density of ovules**



129 Because key genes controlling ovule formation such as *PINI*, *MP* or *CUC1* act in  
130 multiple processes of organogenesis in plants, their interactions might be hardwired, and  
131 classical mutant screens might not deliver insights into the regulation of ovule density  
132 patterning itself. We therefore first resorted to study the range of variation in ovule  
133 density that can be observed between natural accessions of Arabidopsis. We grew the  
134 accessions at two different temperatures as a proxy to further access environmental  
135 control of this patterning process. For 96 accessions, we measured fruit length and the  
136 number of seeds including unfertilized ovules (= total number of ovules) per fruit in stage  
137 17 flowers (all stages according to Smyth et al.,<sup>4</sup>), and calculated total ovule density as a  
138 derived trait (total number of ovules per mm fruit length). The total ovule density strongly  
139 varied between accessions and temperatures, ranging from 2.37 to 6.36 (N/mm) (Figure  
140 S1). Our natural variation analysis revealed several accessions with a characteristic  
141 ovule-density phenotype (Figure 1A, B), which was only mildly affected by temperature.  
142 Hence, we sought regulators by applying QTL analysis to *L. er* x *Cvi-0* recombinant  
143 inbred lines (RILs), since *Cvi-0* has long fruits and a low ovule density, whereas *L. er*  
144 carries shorter fruits with a high ovule density (Figure 1A, B). QTL analysis allowed us to

145 find a significant peak on chromosome 2 (Figure 1C). Among many loci in this  
146 chromosomal region, the *ER* locus seemed to be the most influential candidate. The  
147 accessions Landsberg *erecta* (*L. er*) and Vancouver-0 (Van-0) were characterized by  
148 shorter fruit and a higher ovule density compared to other accessions (Figure 1B, Figure  
149 S1). The *L. er* and Van-0 accessions both carry mutations in the *ER* locus and are known  
150 *er* loss-of-function mutants<sup>29,30</sup>. In addition to these two accessions, Hiroshima-1 (Hir-1)  
151 is also known as an *er* loss-of-function mutant<sup>29,30</sup>. To test the functional importance of  
152 *ER* gene in the control of ovule density, we assessed fruit phenotypes in the *er* mutant  
153 lines complemented with a wildtype copy of the *ER* locus<sup>29-31</sup>. The short fruit and high  
154 ovule density phenotypes in all three accessions were complemented by functional *ER*  
155 genomic DNA from Columbia (Col) (Figure S2). Furthermore, the *er-105* mutant in a Col  
156 background showed a similar phenotype to the *L.er*, Van-0 and Hir-1 accessions (Figure  
157 2A, Figure S2, S3). These results clearly indicate that *ER* is necessary for the control of  
158 ovule density, and that *ER* acts similarly in different genetic backgrounds.

159

160 **ERL1 and ERL2 antagonistically function to ER in the regulation of ovule density**

161 Two *ER* paralogous genes, *ERL1* and *ERL2* have overlapping, yet distinct functions with  
162 *ER* in the regulation of plant architecture<sup>11</sup>. To investigate the potential role of *ERL1* and  
163 *ERL2*, we analyzed *ER*-family receptor mutants in a Col background<sup>15</sup>. Although *erl1-2*  
164 and *erl2-1* single mutants did not display an obvious phenotype, the *erl1-2; erl2-1* double  
165 mutant developed shorter fruits and lower ovule density than the wild-type (Figure 2A,  
166 Figure S3). This is in contrast to *er*-mutants, which carried also shorter fruits, but with a  
167 higher ovule density than wild type. When combined with *er-105*, either *erl1-2* or *erl2-1*  
168 further enhanced the fruit length phenotype and displayed reduced total ovule number,  
169 but surprisingly an even higher ovule density (Figure 2A, Figure S3). Since *er-105*;  
170 *erl1-2; erl2-1* triple mutants are very dwarfed and do not produce proper flower organs<sup>32</sup>  
171 (Figure 2B, C), it was impossible to analyze their fruit or ovule density phenotype.  
172 However, our results indicate that *ERL1* and *ERL2* function jointly with *ER* to promote  
173 fruit growth, whereas two separable *ERL1/2* and *ER* dependent pathways antagonistically  
174 regulate ovule density.

175

176 **EPFL9 is a ligand for ER family receptors that controls fruit elongation**

177 Our genetic analysis suggested that two independent pathways antagonistically control  
178 ovule density- *ER* functions to decrease ovule density whereas *ERL1* with *ERL2* increase  
179 ovule density. This suggests that unknown ligands, binding to ER-family receptors, may  
180 be involved in ovule density control. Previous work identified EPF/EPFL family peptides  
181 as ligands of ER-family receptors that control a variety of biological  
182 processes<sup>19,20,35,21–26,33,34</sup>. We found that within the *EPF/EPFL* family, *EPFL9* is  
183 expressed in developing fruits by searching a public expression database. *EPFL9* has a  
184 unique function in stomatal patterning<sup>21–23</sup>, since all other EPF/EPFL peptides except  
185 *EPFL9* reduce the number of stomata by activating a downstream MAPK cascade via ER  
186 family receptors<sup>17,18,34,35,19–26</sup>. *EPFL9* also interacts with ER-family receptors, but its  
187 binding does not activate a MAPK cascade<sup>25</sup>, thus acting in an antagonistic manner to the  
188 other EPF/EPFL peptides. We then hypothesized that *EPFL9* might function as a ligand  
189 for the control of ovule density. Since an *EPFL9* mutant was not available, we analyzed  
190 *STOMAGEN* RNAi plants<sup>21</sup> and found a clear reduction of fruit length and a higher  
191 ovule density than in wild-type plants (Figure 3A, Figure S4). Together, the phenotype  
192 was weaker than that of *er-105* mutants (Figure 2A, Figure S3). Our result suggests that

193 EPFL9 functions through ER family receptors to promote fruit growth, possibly in  
194 conjunction with other related ligands.

195

### 196 **EPFL2 as a ligand for ER-family receptors in ovule spacing**

197 As we described above, EPFL9 functions as a ligand of ER in the stomata pathway. We  
198 sought further regulators of ovule density by re-analyzing our QTL data set using the ER  
199 marker on chromosome 2 as a cofactor. Cofactor analysis allowed us to improve the  
200 detection power and decrease a type II error (false negative)<sup>36</sup>. QTL analysis revealed  
201 additional contributing regions on chromosome 4 and 5 for the control of seed density  
202 (Figure 1D). Among the candidate loci, we focused on *EPFL2* (At4G37810) on  
203 chromosome 4, which acts with ER-family receptors to control leaf serration<sup>17</sup>. The  
204 *epfl2-1* mutation in the *L.er* background caused, compared to *L.er*, a minor fruit  
205 shortening but a major reduction in ovule number, so that the resulting ovule density was  
206 lowered (Figure S5). When *ER* genomic DNA was introduced into the *epfl2 L.er*  
207 accession (*L.er ER+*), the phenotype was still characterized by short fruit length, a low  
208 ovule number and a low ovule density (Figure 4A, Figure S5), indicating that *EPFL2* acts

209 independently of *ER*. Overall, the *epfl2-1* phenotype closely resembled that of *erl1-2*;  
210 *erl2-1* double mutants (Figure 2A, Figure 4A, Figure S3, Figure S5), suggesting that  
211 ERL1 and ERL2, and not ER, are the key receptors for perception of EPFL2. Since *erl1*  
212 and *erl2* mutants are in the Col accession, we generated the novel *epfl2-2* mutant allele in  
213 the same genetic background using CRISPR/Cas9 for further genetic analysis. We then  
214 crossed *epfl2-2* with *erl1-2; erl2-1* to generate *epfl2-2; erl1-2; erl2-1*, and with *er-105* to  
215 generate *epfl2-2; er-105*. The *epfl2-2; erl1-2; erl2-1* triple mutant showed a similar  
216 phenotype to the parental lines *epfl2-2* and *erl1-2; erl2-1* (Figure 4B, Figure S8).  
217 Furthermore, *epfl2-2; er-105* displayed an additive phenotype, as observed in *L. er*;  
218 *epfl2-1* (Figure 4B, Figure S5, Figure S8). We conclude that EPFL2 mainly functions  
219 with ERL1 and ERL2, and not with ER.

220

### 221 **Loss of *EPFL2* causes irregular patterning and twinning of ovules**

222 We observed abnormal ovules and seeds in both *epfl2* mutants. In some cases (0.27%),  
223 two ovules were initiated and developed from a single funiculus (Figure 5A, B).  
224 Although EPFL2 functions in the ERL1 and ERL2 pathway, this twin-ovule phenotype

225 was not observed in *erl1-2*; *erl2-1* plants, but in the *epfl2-2*; *erl1-2*; *erl2-1* and *epfl2-2*;  
226 *er-105*, indicating that EPFL2 can act also independently of ER-family receptors. In *epfl2*  
227 mutant plants, neighboring cells on the placenta appear to acquire ovule identity and  
228 differentiate into ovules, resulting in twins. In order to visualize early ovule initiation  
229 patterns, we introduced *pDORNRÖSCHEN(DRN)::erGFP* as a marker for the earliest  
230 stages of ovule initiation. During embryogenesis, *MP* activates expression of the  
231 auxin-responsive transcription factor *DRN* in the tip of cotyledons<sup>37,38</sup>. The  
232 semi-quantitative auxin reporter R2D2<sup>39</sup> revealed that auxin maxima are established at  
233 the tip of ovule primordia coinciding with *DRN* expression (Figure 5C-E), indicating that  
234 *DRN* expression also reflects auxin distribution<sup>37,38</sup>, and thus can serve as marker to  
235 visualize ovule initiation patterns. Before ovule initiation, *DRN* was ubiquitously  
236 expressed in the placenta (Figure 5F, G), but when placental cells acquire ovule identity,  
237 *DRN* expression becomes confined to the ovule initial cells (Figure 5H, I). In wild-type  
238 plants, the ovules initiated with 2 to 4 cells intervals (Figure 5J, L). In *epfl2-2* mutants,  
239 *DRN* was expressed in a much broader pattern (Figure 5K) and *DRN* expression domains  
240 appeared less regularly spaced (Figure 5K, L). We quantified the spacing by counting the

241 number of cells between adjacent ovule primordia. In the wildtype, we found on average  
242 2.97 cells between two ovule initial cells, and these average values were slightly  
243 increased for the *epfl2* mutant lines (3.10 cells). Importantly, cell numbers in *epfl2* varied  
244 from 1 to 6 cells, whereas the wild-type displayed a very regular ovule spacing with cell  
245 numbers ranging between 2 to 4 (Figure 5L). We conclude that EPFL2 serves the  
246 initiation of ovules at regularly spaced intervals.

247

#### 248 **ER-family receptors are coexpressed with EPFL2 and EPFL9 in pistils**

249 From our genetic analysis, we concluded that two major pathways control ovule  
250 patterning. One is the EPFL9/ER pathway that mainly controls fruit growth, the other is  
251 the EPFL2/ERL1/ERL2 pathway which has a major impact on ovule density via  
252 regulating ovule initiation patterns, and also weakly contributes to fruit growth. We next  
253 analyzed the expression profiles of *ER*, *ERL1*, *ERL2*, *EPFL9* and *EPFL2*. ER-family  
254 receptors were previously shown to be expressed in different parts of the pistil<sup>15,40</sup>. For  
255 the analysis of ER, ERL1 and ERL2, we used translational fusion lines with YFP as a  
256 reporter<sup>24,41</sup> and for EPFL9 and EPFL2 we generated transcriptional reporter lines using



257 EGFP and TdTomato as fluorescent tags with Histone H2B<sup>17,21</sup>. To visualize the  
258 expression patterns, we combined tissue clearing<sup>42</sup> and confocal microscopy. In stage 8  
259 flowers, ER was broadly expressed in various organs including carpels (Figure 2D),  
260 consistent with previous observations<sup>43</sup>. In the pistils, ER was mainly expressed in the  
261 valve (Figure 2E)<sup>43</sup>, but signal was also weakly detected in ovule primordia and  
262 inter-ovule spaces (Figure 2E). ERL1 expression was not detected in the carpels at early  
263 stages of development (Figure 2F). ERL2 was expressed in the carpels including the  
264 placenta before ovule primordia became apparent (Figure 2H). When ovule primordia  
265 were initiated, the expression of ERL1 and ERL2 was detected in inter-ovule spaces and  
266 the ovule primordia (Figure 2G, I). The signal of ERL2 was strongly visible at the  
267 boundary and the tip of ovule primordia which will develop into the nucellus, the outer  
268 and the inner integuments, but signal was weaker in the basal domain of ovule primordia  
269 (Figure 2I). Compared to ERL2, ERL1 signals were weaker and somehow patchy (Figure  
270 2G). ERL1 and ERL2 were only weakly expressed in valves (Figure 2G, I). As expected  
271 from the STOMAGEN RNAi phenotype, EPFL9 was exclusively expressed in the inner  
272 cell layers of the valves (Figure 3D, E) from stage 8 onwards (Figure 3B, C) but lacking at

273 the valve margin and the replum (Figure 3E). The expression patterns are consistent with  
274 EPFL9 acting as a short range signal that controls fruit growth via ER. In contrast to  
275 EPFL9, EPFL2 expression was detected in the placenta (Figure 4E, F), and importantly,  
276 once the ovule primordia were initiated, confined to the inter-ovule spaces (Figure 4E, F,  
277 G). In transverse sections, EPFL2 expression was also visible in the valve, around the  
278 valve margin and the replum (Figure 4F). However, expression was not noted in carpels  
279 of stage 8 flowers (Figure 4C, D). As previously reported<sup>44</sup>, EPFL2 seems to be  
280 preferentially expressed at the boundary between ovules.

281

### 282 **Altered expression of EPFL2 affects the ovule initiation pattern**

283 The *DRN* expression profile in the placenta is largely complementary to that of *EPFL2*  
284 (Figure 4C, D, E, F, G, 5F, G, H, I). To further test the importance of *EPFL2* in the pattern  
285 of ovule initiation, we characterized the transgenic plants which misexpress *EPFL2* from  
286 the *DRN* promoter (Figure 5F, G, H, I). When *EPFL2* misexpression was driven by the  
287 *DRN* promoter in a wild-type background (*pDRN::EPFL2*), the resulting transgenic  
288 plants carried fruit with a length similar to the non-transgenic siblings (Figure S9), but

289 showed a significantly reduced ovule number and ovule density (Figure 5M, Figure S9).

290 This indicated that EPFL2 cannot promote fruit growth from the placenta domain, and

291 that a regular and interspersed expression of EPFL2 is required for proper spacing of

292 ovule initiation.

293

#### 294 **Quantitative analysis reveals interactions between peptides and receptors**

295 Our genetic analysis indicates that EPFL2 acts preferentially via ERL1 and ERL2;

296 however, earlier co-immunoprecipitation experiments in *Nicotiana benthamiana* have

297 shown that EPFL2 can physically associate with all ER-family receptors *in vivo*<sup>17</sup>.

298 Because EPF/EPFL peptides may bind to ER-family receptors with different affinities<sup>45</sup>,

299 we investigated interaction properties between ER-family receptors and their ligands

300 EPFL9 and EPFL2 *in vitro*. Recombinant peptides and the extracellular domains of

301 ER-family receptors were expressed in *E. coli* and purified. Because EPFL2 and EPFL9

302 are cysteine-rich and their final conformation is stabilized by the formation of specific

303 disulfide bonds, the peptides were first affinity purified, refolded in refolding buffer, and

304 separated from unfolded peptides by HPLC<sup>24</sup>. We then evaluated peptide bioactivity by

305 measuring their impact on stomatal density. As a control, six cysteine residues of EPFL2  
306 were substituted to serine residues (EPFL2 (CS)), which should render the peptide less  
307 stable. As observed in transgenic EPFL2-overexpressing Arabidopsis lines<sup>17,35</sup>, EPFL2  
308 treatment reduced the number of stomata (Figure S11B, I), whereas EPFL9 had the  
309 opposite effect (Figure S11D, I). Furthermore, since TOO MANY MOUTH (TMM) is a  
310 stomatal lineage specific co-receptor protein<sup>46</sup> and not expressed at the carpel wall and  
311 the placenta (Figure S10), we also used *tmm-KO* plants. *tmm* knockout mutants were  
312 found to be sensitized for EPFL2 and responded more strongly (Figure S11F, I), which is  
313 consistent with previous studies<sup>35,45</sup>. These assays indicated that the purified peptides  
314 were functional. We then tested the direct interactions between the peptides and receptors  
315 using isothermal titration calorimetry (ITC). Both EPFL2 and EPFL9 bound to the  
316 extracellular domain of ER-family receptors, albeit with different affinities. EPFL2  
317 showed a binding preference for ERL1 and ERL2 (Figure S12). EPFL9 bound to ER,  
318 ERL1 and ERL2 with similar affinities (Figure S12).

319 From our combined data, we propose that regular spacing of ovules at defined intervals is  
320 coordinated with fruit growth through the EPFL2/ERL1/ERL2 and EPFL9/ER signalling

321 pathways.

322

### 323 **Discussion**

324 In selfing species such as Arabidopsis, pollen availability is no longer a limiting factor for  
325 fertilization, and the key determinant for seed production is now ovule number. The  
326 total number of seeds that can be generated by an individual plant depends on the  
327 available resources which can be invested into the formation of branches carrying  
328 flowers.

329 Overall reproductive success then depends on the total number of flowers, and the  
330 number of ovules that are being initiated in each individual flower. In the developing  
331 Arabidopsis ovary, ovules are initiated from the placenta, and the total length of the pistil  
332 at the time of ovule initiation restricts the maximum number of ovules that can be formed.

333 Not surprisingly, there is a general correlation between fruit length and overall seed  
334 number, so that ecotypes that generate longer siliques also bear more seeds. The genetic  
335 basis of ovule initiation and fruit growth has been studied in much detail, and a number of  
336 key transcription factors and phytohormones have been investigated which control the

337 formation of ovules and fruit development. However, the fundamental patterning  
338 mechanism that determines the spacing of ovule anlagen within the placenta remained  
339 unexplored.

340 Organ initiation in plants generally requires auxin accumulation at discrete sites. Using  
341 the auxin-regulated transcription factor DRN as a sensor for auxin signalling, we found  
342 that an evenly distributed auxin signal in the developing placenta is resolved into a  
343 regularly spaced pattern of founder cells of the young ovules. Importantly, this patterning  
344 process is not a repetitive process and takes place in a structure with a finite size, which  
345 clearly distinguishes it from other well studied patterning processes in plants, such as  
346 phyllotaxis or stomatal patterning. We therefore carried out a natural variation analysis  
347 and QTL analysis to identify genes responsible for ovule density, leading to the  
348 identification of *ER* and *EPFL2*. Additionally, we found that the ER paralogs ERL1 and  
349 ERL2, as well as the EPF/EPFL-family peptide EPFL9, also regulate ovule density. Our  
350 genetic interaction studies and expression analysis showed that these two pathways  
351 control ovule density in distinct ways. The EPFL9 pathway, acting from the carpel wall,  
352 exclusively controls fruit elongation without affecting the ovule initiation pattern.

353 Reduction of ovule number observed in *er-105* seems to be an indirect consequence of the  
354 smaller fruit size and the limited availability of space. The EPFL2 pathway also affects  
355 fruit growth, but has a more pronounced impact on the patterning of ovule initial cells and  
356 thus increases ovule density (Figure 6A, B).

357 We observed ovule twinning in *epfl2* mutant plants, which is caused by mis-patterning  
358 during ovule initiation. Furthermore, ectopic expression of EPFL2 also caused ovule  
359 patterning defects, which we interpret that EPFL2 is a dosage-sensitive regulator of ovule  
360 initiation. Our genetic, biochemical and expression data further suggest that ERL1 and  
361 ERL2 are the main receptors for EPFL2. Among these two, ERL2 has a major role as a  
362 receptor for EPFL2 for two reasons: First, the *erl2-1* mutant enhanced the *er-105*  
363 phenotype more severely than *erl1-2*, and second, ERL1 is expressed at lower levels than  
364 ERL2 in the placenta. Ovule twinning was observed in *epfl2-2*; *erl1-2*; *erl2-1* as well as  
365 *epfl2-2* mutants, but not in *erl1-2*; *erl2-1* mutants, suggesting that in the absence of ERL1  
366 and ERL2, other receptors contribute to EPFL2-mediated ovule initiation. TMM is a  
367 well-characterized co-receptor for ER-family receptors in stomata development, but  
368 since TMM is not expressed in the pistil (Figure S10)<sup>46</sup>, it is not likely to act here.

369 The transcriptional regulation of *EPFL2* is so far unknown, but it is tempting to speculate  
370 that the transcription factors, *CUC1*, *CUC2*, and *CUC3* are potential upstream regulators  
371 of *EPFL2* expression, because their expression profiles are similar to that of *EPFL2*<sup>10,47</sup>,  
372 and *CUC1 RNAi*; *cuc2* plants produce fewer ovules than wild-type plants<sup>10</sup>.  
373 Transcriptomic analysis revealed that some of *EPFL* family genes were downregulated in  
374 *CUC1 RNAi*; *cuc2* plants<sup>7</sup>. *cuc2-3*; *cuc3-105* mutants can carry twinned ovules<sup>47</sup>, as seen  
375 in *epfl2*, and *EPFL2* expression under the control of the *CUC2* promoter was sufficient to  
376 restore the leaf margin serration phenotype of *epfl2* mutants<sup>17</sup>.  
377 Prior to ovule primordia initiation, *DRN* expression was uniformly observed at the  
378 placenta (Figure 5C). Since *DRN* is a direct target of MP<sup>38</sup>, auxin seems to be signalling  
379 uniformly during early stages of placenta growth. However, once placenta cells adopt  
380 ovule identity, auxin maxima are established at the tip of ovule initials<sup>2</sup> (Figure 5C-E)  
381 and *DRN* expression is confined to these positions (Figure 5H). We propose that similar  
382 to the feedback mechanism that operates in leaf margin development<sup>17</sup>, *EPFL2* restricts  
383 auxin accumulation to the developing ovule primordia, while auxin at the same time  
384 provides a feedback signal that suppresses *EPFL2* expression (Figure 6C). This



385 auxin-*EPFL2* negative feedback loop provides an important new element to control  
386 precise and highly regular ovule spacing patterns, which safeguards equal nutrient access  
387 as a bet hedging strategy. With its additional function in promoting fruit growth due to  
388 expression in the carpel wall, *EPFL2* thus serves to integrate these two processes. Life  
389 history variations that necessitate trade-offs between seed number, seed size and fruit size  
390 could then act through differential expression of *EPFL2*.  
391 Cultivated asian rice was selected for awnlessness to facilitate harvesting. One of the  
392 underlying causal mutation inactivates an *EPFL2*-orthologue, OsEPFL1, which also  
393 affects grain length and grain number, giving rise to more compact panicles with more  
394 seeds<sup>48-50</sup>. Although the underlying mechanism in rice is not yet understood, it highlights  
395 a role of *EPFL2*-genes as evolutionary conserved integrators of ovule initiation patterns,  
396 seed number, seed size and floral organ development<sup>51</sup>.

397

## 398 **Materials and Methods**

### 399 **Plant materials and growth conditions**

400 For natural variation analysis, 96 *A. thaliana* ecotypes<sup>52</sup> were planted and grown in

401 continuous light at either 16°C or 21°C. After germination, the plants were vernalized for  
402 6 weeks at 4°C. For QTL analysis, 165 RILs<sup>5</sup> were planted and grown in continuous light  
403 at 16°C. For phenotypic and expression analysis, plants were grown under long-day  
404 conditions (16-h photoperiod). The Van-0, Van-0 *ER+*, Hir-1, and Hir-1 *ER+* accessions  
405 were previously described<sup>30</sup>. The *L. er; epfl2-1* (CSHL\_ET5721), *L. er; epfl2-1; ER+*,  
406 and *L. er; ER+* lines were previously described<sup>17</sup>. An *epfl2* mutant in the Columbia  
407 accession was generated by CRISPR/Cas9. For this, we designed two single guide RNAs  
408 targeting *epfl2* (Figure S6A) in one vector. We obtained five different *epfl2* mutant alleles  
409 in the T2 generation (Figure S6B), all of which caused a smoother leaf margin phenotype  
410 indicative of *epfl2*-mutants (Figure S6C) as previously reported<sup>17</sup>. For further analysis,  
411 #36-45 which has a genomic deletion between the sgRNA1 and 2 target sites was selected.  
412 Hereafter we refer to the original *epfl2* mutant in *L. er* (CSHL\_ET5721) as *epfl2-1* and  
413 our new allele #36-45 as *epfl2-2*. Consistent with our previous analysis using *epfl2-1*, we  
414 found that *epfl2-2* phenocopies *epfl2-1* (Figure 4A, Figure S7), and that *epfl2-2* mutants  
415 also resemble the *erl1-2; erl2-1* phenotype (Figure 2A and 4A). The *gER:YFP; er-105*,  
416 *gERL1:YFP; erl1-2* and *gERL2:YFP* lines were previously described<sup>24,41</sup>. The *er-105*,

417 *erl1-2*, *erl2-1*, *er-105*; *erl1-2*, *er-105*; *erl2-1*, *erl1-2*; *erl2-1* lines were previously  
418 described<sup>15</sup>. The STOMAGEN RNAi line was generated<sup>21</sup>. The *pDRN::GFP; Col* was  
419 described<sup>38</sup>. The auxin semi-quantitative marker line R2D2 was developed in<sup>39</sup>. The  
420 *epfl2-2* and *epfl2-3* lines were generated by CRISPR/Cas9 genome editing in this study,  
421 and the *epfl2-2; er-105*, *epfl2-2; erl1-2*; *erl2-1* were generated by genetic crossing. We  
422 also generated the following transgenic plant lines: *pEPFL2::H2B:TdTomato; Col*,  
423 *pEPFL9::H2B:EGFP:3HA:His; Col*, *pDRN::EPFL2; Col*, and *pDRN::GFP; epfl2-2*.  
424 Plants were transformed using *Agrobacterium tumefaciens* strain GV3101 or C58 pSOUP  
425 via the floral dip method.

426

#### 427 **QTL analysis**

428 For the RIL population, the final phenotype value for each line was calculated as the  
429 average of all the replicates. The Genotype information from 243 markers in the Ler/Cvi  
430 RIL map was collected from available published data<sup>5</sup>. QTL analysis was performed  
431 within the R statistical software with the *qtl* package<sup>53</sup> using a Multiple QTL Mapping  
432 (MQM) approach. In the MQM mapping approach, we used a forward stepwise approach

433 preselecting the ERECTA marker as a cofactor.

434

#### 435 **Plasmid constructs**

436 The plasmids and primers used in this study are listed in Table S1. Vectors pFH1 and  
437 pFH6<sup>54</sup> along with the in-house vector pUB-Cas9-@EPFL2 were used for the knockout  
438 of *EPFL2* with the CRISPR/Cas9 system. To generate the construct  
439 pEPFL2::H2B:TdTomato, *EPFL2* promoter DNA was amplified by PCR from Col  
440 genomic DNA and inserted at the HindIII and SmaI sites of pPZP211/35S using the  
441 InFusion kit (Clontech) yielding the intermediate vector pPZP211/pEPFL2. The *H2B*  
442 (At5g22880) gene was amplified from Col cDNA and was inserted into the SmaI and  
443 SacI sites of pPZP211/pEPFL2 using the same method, yielding vectors  
444 pPZP211/pEPFL2::H2B. Finally the TdTomato gene was amplified and inserted into the  
445 SacI and SacII sites of pPZP211/pEPFL2::H2B to generate  
446 pPZP211/pEPFL2::H2B:TdTomato. To generate the construct pEPFL2::EPFL2, the  
447 *EPFL2* coding sequence was inserted into pPZP211/pEPFL2 at the BamHI and SacII  
448 sites. To construct the pDRN::EPFL2 vector, the *DRN* promoter and terminator

449 sequences and the *EPFL2* coding sequence were amplified by PCR from Col genomic  
450 DNA or cDNA and inserted into vectors pGGA000, pGGE000, and pGGC000  
451 respectively. The pGGZ001, pGGA000-pDRN, pGGB002, pGGC000-EPFL2,  
452 pGGD002, pGGE000-tDRN and pGGF007 DNA fragments were then assembled by  
453 GreenGate cloning<sup>55</sup>. For pEPFL9:H2B-EGFP(or TdTomato):3HA:His, the *H2B* gene  
454 was amplified as above and inserted into the SmaI and SacI sites of  
455 pPZP211/35S:EGFP(or TdTomato)-3HA-His<sup>56</sup>. The plasmids were digested with XbaI  
456 and EcoRI, and the H2B-EGFP (or TdTomato) 3HA-His:NosT fragments were  
457 transferred to vector pPZP211. The *EPFL9* promoter was amplified from Col genomic  
458 DNA and inserted into the vectors at the SalI and SmaI sites using the InFusion kit as  
459 above. Codon optimized mature EPFL2 and mutated mature EPFL2 sequences were  
460 synthesized (Thermo Fisher Scientific) and cloned into the SacII and XhoI sites of  
461 pET41a. Mature EPFL9 was amplified from *Arabidopsis thaliana* Col cDNA and cloned  
462 into pGEX4T1 by Gibson assembly (NEB). Ectodomains of ER (E25-R580), ERL1  
463 (M26-R582), ERL2 (M28-R585) were amplified from *Arabidopsis thaliana* Col cDNA  
464 and cloned into pETEV16 by Gibson assembly (NEB).

465

466 **Photography of leaves**

467 To characterize the leaf margin, the seventh leaf of each plant was photographed under a

468 Nikon SMZ25 stereomicroscope.

469

470 **Data visualization and statistical analysis**

471 R (version 3.5.1) was used for data visualization and statistical analysis. The following

472 statistical tests were used to calculate the corresponding p-values. A two-tailed Student's

473 t-test was used for pairwise comparisons, whereas Dunnett's test and Tukey-Kramer's test

474 were used to compare multiple sets of data to a control or all possible pairs, respectively.

475 F-test was used to compare two variations. In each case, a value of  $p < 0.005$  was

476 considered significant.

477

478 **Tissue clearing and expression analysis**

479 Flowers and pistils were dissected under a standard dissection microscope. The samples

480 were fixed in freshly prepared 4% paraformaldehyde in PBS (pH 7.4) supplemented with

481 0.05% Silwet L-77 for 3–5 h under vacuum, followed by incubation in ClearSee as  
482 previously described [41]. The tissues were then stained with Calcofluor White to  
483 visualize the cell walls. The processed tissues were observed under a confocal  
484 microscope (Carl Zeiss LSM780, Carl Zeiss LSM880 or Leica TCS SP8). For GFP, the  
485 excitation wavelength was 488 nm and the signal was detected at 500–550 nm. For YFP,  
486 the excitation wavelength was 514 nm and the signal was detected at 520–575 nm. For  
487 TdTomato, the excitation wavelength was 561 nm and the signal was detected at 565–600  
488 nm. For Calcofluor White, the excitation wavelength was 405 nm and the signal was  
489 detected at 415–475 nm. These ranges were selected to avoid overlaps between the  
490 signals.

491

#### 492 **Peptide expression, purification and refolding and protein expression**

493 Mature EPFL2 (MEPFL2) and mutant mature EPFL2 (mMEPFL2; C60S, C65S, C68S,  
494 C71S, C119S, C121S) were heterologously expressed in *E. coli* BL21 (DE3) as  
495 GST-His-tagged fusion proteins. EPFL9 was expressed only as GST-fusion protein in *E.*  
496 *coli* BL21. Peptides were purified via GST affinity chromatography by FPLC (Äkta

497 Prime Plus, GE Healthcare). The GST tag was proteolytically cleaved by TEV-protease  
498 digestion. Peptides were separated from free GST and residual protease via reverse  
499 phase-HPLC (Supelcosil, LC-18 HPLC column, 15x4.6 cm, 3µm particle size) under an  
500 acetonitrile gradient (0-100% v/v) with 0.1%TFA (v/v). After vacuum assisted solvent  
501 evaporation, peptide pellets were resolved in refolding buffer as previously described to  
502 introduce proper disulfide bridges, which were indirectly verified by the stomata density  
503 based bioactivity assay. Peptide identities and purities were confirmed by mass  
504 spectrometry which revealed two additional amino acids (Gly-His) were attached at  
505 N-terminus of each peptide, as results of the TEV-protease cleavage.

506 Receptor domains of ER (E25-R580), ERL1 (M26-R582), ERL2 (M28-R585) and TMM  
507 (F24-G475) were heterologously expressed in *E. coli* BL21 (DE3) with an N-terminal  
508 His-tag and TEV-protease target sequence. The expressed protein domains were purified  
509 via Ni<sup>2+</sup> affinity chromatography by FPLC (Äkta Prime Plus, GE Healthcare). The eluted  
510 proteins were subjected to buffer change by PD10 desalting column into ITC-buffer (25  
511 mM BisTris-HCl pH6.0, 150 mM NaCl, 50 mM L-arginine and 50 mM L-glutamic acid).

512



513 **Peptide bioassay**

514 Col and *tmm* knockout (*tmm-KO*, Salk\_011958) seeds were sterilized and sown on  
515 half-strength MS medium. Prior to germination, seeds were kept in the dark at 4°C for 3  
516 days, then transferred to continuous light at 22°C for germination. One day after  
517 germination, the seedlings were transferred to 1 ml half-strength MS liquid medium  
518 supplemented with 5 µM of the appropriate peptide in 0.5 g/L MES-KOH (pH 5.7) and  
519 were incubated as above for 5 days. At the end of the treatment period, the cotyledons  
520 were stained with 1 µg/ml propidium iodide and observed under a Confocal microscope  
521 (Carl Zeiss LSM710, Carl Zeiss LSM880 or Leica TCS SP8). For excitation, 561 nm  
522 laser line was used and signal was collected between 565–650 nm. The MES-KOH buffer  
523 (pH 5.7) without peptides was used for the mock treatment.

524

525 **ITC**

526 ITC-experiments were carried out in a MicroCal iTC200 (Malvern Instruments) at 25°C  
527 with a sample cell of 280 µL and an injection syringe of 40 µL. Peptide pellets were  
528 dissolved in ITC-buffer and peptide concentrations were assessed by FTIR with a

529 DirectDetect system (Merck). Protein concentrations of the receptor domains were  
530 measured by absorption at 280 nm and calculated by their molar absorption coefficient at  
531 280 nm. The molar coefficients for ER, ERL1 and ERL2 (42400, 41410, and 42400 M<sup>-1</sup>  
532 cm<sup>-1</sup>, respectively) were calculated based on ExPASy ProtParam. Final protein and  
533 peptide concentrations are as indicated. For each experiment 19 injections of 2 µL with a  
534 spacing of 150s were performed.

535

### 536 **Acknowledgement**

537 We thank the Center for Advanced imaging (CAi) at the Heinrich-Heine University  
538 Düsseldorf for support with microscopy. We are grateful for receiving Arabidopsis seeds  
539 from the following colleagues: Martijn van Zanten (Van-0, Van-0 ER+, Hir-1, Hir-1  
540 ER+), Wolfgang Werr (pDRN::GFP), Dolf Weijers (R2D2) , Dominique Bergmann  
541 (gERL2:YFP), Ikuko Hara-Nishimura and Tomoo Shimada (STOMAGEN RNAi). This  
542 work was supported by the DFG through the Cluster of Excellence on Plant Sciences  
543 (CEPLAS, EXC1028).

544

## 545 **References**

- 546 1. Srikanth, A. & Schmid, M. Regulation of flowering time: All roads lead to Rome.  
547 *Cell. Mol. Life Sci.* **68**, 2013–2037 (2011).
- 548 2. Cucinotta, M., Colombo, L. & Roig-Villanova, I. Ovule development, a new  
549 model for lateral organ formation. *Front. Plant Sci.* **5**, 117 (2014).
- 550 3. Skinner, D. J., Hill, T. A. & Gasser, C. S. Regulation of Ovule Development.  
551 *PLANT CELL ONLINE* **16**, S32–S45 (2004).
- 552 4. Smyth, D. R., Bowman, J. L. & Meyerowitz, E. M. Early Flower Development in  
553 *Arabidopsis*. *Plant Cell* **2**, 755–767 (1990).
- 554 5. Alonso-Blanco, C., Blankestijn-de Vries, H., Hanhart, C. J. & Koornneef, M.  
555 Natural allelic variation at seed size loci in relation to other life history traits of  
556 *Arabidopsis thaliana*. *Proc. Natl. Acad. Sci. U. S. A.* **96**, 4710–7 (1999).
- 557 6. Cucinotta, M. *et al.* Cytokinin response factors integrate auxin and cytokinin  
558 pathways for female reproductive organ development. *Development* **143**,  
559 4419–4424 (2016).
- 560 7. Cucinotta, M. *et al.* CUP-SHAPED COTYLEDON1 (CUC1) and CUC2 regulate

- 561 cytokinin homeostasis to determine ovule number in Arabidopsis. *J. Exp. Bot.* **69**,  
562 5169–5176 (2018).
- 563 8. Bencivenga, S., Simonini, S., Benkova, E. & Colombo, L. The Transcription  
564 Factors BEL1 and SPL Are Required for Cytokinin and Auxin Signaling During  
565 Ovule Development in Arabidopsis. *Plant Cell* **24**, 2886–2897 (2012).
- 566 9. Gomez, M. D. *et al.* Gibberellins negatively modulate ovule number in plants.  
567 *Development* **145**, dev163865 (2018).
- 568 10. Galbiati, F. *et al.* An integrative model of the control of ovule primordia formation.  
569 *Plant J.* **76**, 446–455 (2013).
- 570 11. Yuan, J. & Kessler, S. A. A genome-wide association study reveals a novel  
571 regulator of ovule number and fertility in Arabidopsis thaliana. *PLOS Genet.* **15**,  
572 e1007934 (2019).
- 573 12. Rédei, G. P. Single locus heterosis. *Z. Vererbungsl.* **93**, 164–170 (1962).
- 574 13. Torii, K. U. *et al.* The Arabidopsis ERECTA gene encodes a putative receptor  
575 protein kinase with extracellular leucine-rich repeats. *Plant Cell* **8**, 735–746  
576 (1996).

- 577 14. Shpak, E. D., McAbee, J. M., Pillitteri, L. J. & Torii, K. U. Stomatal Patterning and  
578 Differentiation by Synergistic Interactions of Receptor Kinases. *Science* (80-. ).  
579 **309**, 290–293 (2005).
- 580 15. Shpak, E. D., Berthiaume, C. T., Hill, E. & Torii, K. U. Synergistic interaction of  
581 three ERECTA-family receptor-like kinases controls Arabidopsis organ growth  
582 and flower development by promoting cell proliferation. *Development* **131**,  
583 1491–1501 (2004).
- 584 16. Uchida, N. & Tasaka, M. Regulation of plant vascular stem cells by  
585 endodermis-derived EPFL-family peptide hormones and phloem-expressed  
586 ERECTA-family receptor kinases. *J. Exp. Bot.* **64**, 5335–5343 (2013).
- 587 17. Tameshige, T. *et al.* A Secreted Peptide and Its Receptors Shape the Auxin  
588 Response Pattern and Leaf Margin Morphogenesis. *Curr. Biol.* **26**, 2478–2485  
589 (2016).
- 590 18. Hara, K. *et al.* Epidermal Cell Density is Autoregulated via a Secretory Peptide,  
591 EPIDERMAL PATTERNING FACTOR 2 in Arabidopsis Leaves. *Plant Cell*  
592 *Physiol.* **50**, 1019–1031 (2009).

- 593 19. Hara, K., Kajita, R., Torii, K. U., Bergmann, D. C. & Kakimoto, T. The secretory  
594 peptide gene EPF1 enforces the stomatal one-cell-spacing rule. *Genes &*  
595 *Development* **21**, 1720–1725 (2007).
- 596 20. Hunt, L. & Gray, J. E. The Signaling Peptide EPF2 Controls Asymmetric Cell  
597 Divisions during Stomatal Development. *Curr. Biol.* **19**, 864–869 (2009).
- 598 21. Sugano, S. S. *et al.* Stomagen positively regulates stomatal density in Arabidopsis.  
599 *Nature* **463**, 241–244 (2010).
- 600 22. Kondo, T. *et al.* Stomatal density is controlled by a mesophyll-derived signaling  
601 molecule. *Plant Cell Physiol.* **51**, 1–8 (2010).
- 602 23. Hunt, L., Bailey, K. J. & Gray, J. E. The signalling peptide EPFL9 is a positive  
603 regulator of stomatal development. *New Phytol.* **186**, 609–614 (2010).
- 604 24. Lee, J. S. *et al.* Direct interaction of ligand-receptor pairs specifying stomatal  
605 patterning. *Genes Dev.* **26**, 126–136 (2012).
- 606 25. Lee, J. S. *et al.* Competitive binding of antagonistic peptides fine-tunes stomatal  
607 patterning. *Nature* **522**, 439–443 (2015).
- 608 26. Qi, X. *et al.* Autocrine regulation of stomatal differentiation potential by EPF1 and

- 609           ERECTA-LIKE1 ligand-receptor signaling. *Elife* **6**, 1–21 (2017).
- 610   27.   Davies, K. A. & Bergmann, D. C. Functional specialization of stomatal bHLHs  
611           through modification of DNA-binding and phosphoregulation potential. *Proc.*  
612           *Natl. Acad. Sci.* **111**, 15585–15590 (2014).
- 613   28.   Lampard, G. R., MacAlister, C. A. & Bergmann, D. C. Arabidopsis Stomatal  
614           Initiation Is Controlled by MAPK-Mediated Regulation of the bHLH  
615           SPEECHLESS. *Science (80-. )*. **322**, 1113–1116 (2008).
- 616   29.   Koornneef, M., Alonso-Blanco, C. & Vreugdenhil, D. Naturally occurring genetic  
617           variation in *Arabidopsis thaliana*. *Annu. Rev. Plant Biol.* **55**, 141–172 (2004).
- 618   30.   van Zanten, M. *et al.* Ethylene-induced hyponastic growth in *Arabidopsis thaliana*  
619           is controlled by ERECTA. *Plant J.* **61**, 83–95 (2010).
- 620   31.   Godiard, L. *et al.* ERECTA, an LRR receptor-like kinase protein controlling  
621           development pleiotropically affects resistance to bacterial wilt. *Plant J.* **36**,  
622           353–365 (2003).
- 623   32.   Bemis, S. M., Lee, J. S., Shpak, E. D. & Torii, K. U. Regulation of floral patterning  
624           and organ identity by *Arabidopsis erecta*-family receptor kinase genes. *J. Exp. Bot.*

- 625 (2013). doi:10.1093/jxb/ert270
- 626 33. Uchida, N. *et al.* Regulation of inflorescence architecture by intertissue layer  
627 ligand-receptor communication between endodermis and phloem. *Proc. Natl.*  
628 *Acad. Sci.* **109**, 6337–6342 (2012).
- 629 34. Abrash, E. B. & Bergmann, D. C. Regional specification of stomatal production by  
630 the putative ligand CHALLAH. *Development* **137**, 447–455 (2010).
- 631 35. Abrash, E. B., Davies, K. A. & Bergmann, D. C. Generation of Signaling  
632 Specificity in Arabidopsis by Spatially Restricted Buffering of Ligand–Receptor  
633 Interactions. *Plant Cell* **23**, 2864–2879 (2011).
- 634 36. Sahana, G., de Koning, D. J., Guldbrandtsen, B., Sørensen, P. & Lund, M. S. The  
635 efficiency of mapping of quantitative trait loci using cofactor analysis in half-sib  
636 design. *Genet. Sel. Evol.* **38**, 167–182 (2006).
- 637 37. Kirch, T., Simon, R., Grünewald, M. & Werr, W. The  
638 DORNRÖSCHEN/ENHANCER OF SHOOT REGENERATION1 Gene of  
639 Arabidopsis Acts in the Control of Meristem Cell Fate and Lateral Organ  
640 Development. *Plant Cell* **15**, 694–705 (2003).



- 641 38. Cole, M. *et al.* DORNROSCHEN is a direct target of the auxin response factor  
642 MONOPTEROS in the Arabidopsis embryo. *Development* **136**, 1643–1651  
643 (2009).
- 644 39. Liao, C. *et al.* Reporters for sensitive and quantitative measurement of auxin  
645 response. *Nat. Methods* **12**, 207–210 (2015).
- 646 40. Pillitteri, L. J., Bemis, S. M., Shpak, E. D. & Torii, K. U. Haploinsufficiency after  
647 successive loss of signaling reveals a role for ERECTA -family genes in  
648 Arabidopsis ovule development. **3109**, 3099–3109 (2007).
- 649 41. Ho, C.-M. K., Paciorek, T., Abrash, E. & Bergmann, D. C. Modulators of Stomatal  
650 Lineage Signal Transduction Alter Membrane Contact Sites and Reveal  
651 Specialization among ERECTA Kinases. *Dev. Cell* **38**, 345–357 (2016).
- 652 42. Kurihara, D., Mizuta, Y., Sato, Y. & Higashiyama, T. ClearSee: a rapid optical  
653 clearing reagent for whole-plant fluorescence imaging. *Development* 4168–4179  
654 (2015). doi:10.1242/dev.127613
- 655 43. Yokoyama, R., Takahashi, T., Kato, A., Torii, K. U. & Komeda, Y. The  
656 Arabidopsis ERECTA gene is expressed in the shoot apical meristem and organ

- 657           primordia. *Plant J.* **15**, 301–310 (1998).
- 658    44.   Kosentka, P. Z., Overholt, A., Maradiaga, R., Mitoubsi, O. & Shpak, E. D. EPFL  
659           Signals in the Boundary Region of the SAM Restrict Its Size and Promote Leaf  
660           Initiation. *Plant Physiol.* **179**, 265–279 (2019).
- 661    45.   Lin, G. *et al.* A receptor-like protein acts as a specificity switch for the regulation  
662           of stomatal development. *Genes Dev.* **31**, 927–938 (2017).
- 663    46.   Nadeau, J. A. & Sack, F. D. Control of Stomatal Distribution on the Arabidopsis  
664           Leaf Surface. *Science (80-. )*. **296**, 1697–1700 (2002).
- 665    47.   Gonçalves, B. *et al.* A conserved role for CUP-SHAPED COTYLEDON genes  
666           during ovule development. *Plant J.* **83**, 732–742 (2015).
- 667    48.   Yano, K. *et al.* Genome-wide association study using whole-genome sequencing  
668           rapidly identifies new genes influencing agronomic traits in rice. *Nat. Genet.*  
669           (2016). doi:10.1038/ng.3596
- 670    49.   Bessho-Uehara, K. *et al.* Loss of function at RAE2 , a previously unidentified  
671           EPFL, is required for awnlessness in cultivated Asian rice . *Proc. Natl. Acad. Sci.*  
672           (2016). doi:10.1073/pnas.1604849113

- 673 50. Jin, J. *et al.* GAD1 Encodes a Secreted Peptide That Regulates Grain Number,  
674 Grain Length, and Awn Development in Rice Domestication . *Plant Cell* **28**,  
675 2453–2463 (2016).
- 676 51. Zhang, Y. *et al.* Natural alleles of GLA for grain length and awn development  
677 were differently domesticated in rice subspecies japonica and indica . *Plant*  
678 *Biotechnol. J.* 1–13 (2019). doi:10.1111/pbi.13080
- 679 52. Nordborg, M. *et al.* The Pattern of Polymorphism in *Arabidopsis thaliana*. *PLoS*  
680 *Biol.* **3**, e196 (2005).
- 681 53. Broman, K. W., Wu, H., Sen, S. & Churchill, G. A. R/qtl: QTL mapping in  
682 experimental crosses. *Bioinformatics* **19**, 889–890 (2003).
- 683 54. Hahn, F. *et al.* An Efficient Visual Screen for CRISPR/Cas9 Activity in  
684 *Arabidopsis thaliana*. *Front. Plant Sci.* **08**, (2017).
- 685 55. Lampropoulos, A. *et al.* GreenGate - A Novel , Versatile , and Efficient Cloning  
686 System for Plant Transgenesis. **8**, (2013).
- 687 56. Kawamoto, N., Sasabe, M., Endo, M., Machida, Y. & Araki, T.  
688 Calcium-dependent protein kinases responsible for the phosphorylation of a bZIP

689 transcription factor FD crucial for the florigen complex formation. *Sci. Rep.* **5**,

690 8341 (2015).

691

## 692 **Figure legends**

693 **Figure 1. Identification of responsible loci for the reproductive traits.** (A) Image of

694 seed density in *L. er* (left) and Cvi-0 (right). Bar = 1 mm. (B) Natural variation analysis

695 on seed density (seed number/fruit length (mm)) phenotype at 16°C (cyan) and 21°C (red).

696 Fourteen selected representative accessions are presented. See the supplementary figure 1

697 for the phenotype of all accessions. (C) QTL analysis using *L. er* x Cvi-0 recombinant

698 inbred lines [45]. (D) QTL re-analysis with ER as a cofactor. X and Y axes indicate

699 chromosome position and LOD values, respectively.

700

## 701 **Figure 2. Genetic and expression analysis of ER family receptors**

702 (A) Seed density (seed number/fruit length (mm)). 40 fruits were measured from 3 plants

703 in each genotype. (B) Two weeks old *er-105; erl1-2; erl2-1* plant. (C) Six weeks old

704 *er-105; erl1-2; erl2-1* plant. Expression patterns of ER, ERL1 and ERL2 in stage 8 flower

705 (D, F, H) or later stage (E, G, I) of developing pistils. se, st, ca, v and r indicate sepals,  
706 stamens, carpels, valve, replum, respectively. (D, F, H) and (E, G, I) share same scales,  
707 respectively. Scale bar = 1 mm (B), 5 mm (C) and 50  $\mu$ m (D, E, F, G, H, I).  
708 Tukey-Kramer's test was used for the statistical analysis. Different letters indicate  
709 significant difference ( $p < 0.005$ ).

710

711 **Figure 3. Identification of EPFL9 as a potential ligand for ER**

712 (A) Seed density (seed number/fruit length (mm)). 40 fruits were measured from 3 plants  
713 in each genotype. (B-E) Expression pattern of EPFL9 at stage 8 flower (B, C) and stage 9  
714 flower (D, E). Transverse cross section (C, E) were obtained along the lines in (B) and  
715 (D). st, ca, v and r indicate sepals, stamens, carpels, valve, replum, respectively. Histone  
716 H2B fused EGFP was used as a reporter. Bar = 50  $\mu$ m. Student's t-test was used for the  
717 statistical analysis. Different letters indicate significant difference ( $p < 0.005$ ).

718

719 **Figure 4. Identification of EPFL2 as a patterning regulator of ovule initiation**

720 (A) Seed density (seed number/fruit length(mm)). 40 fruits were measured from 3 plants

721 in each genotype. (B) Genetic interaction analysis either with *er-105* or *er11-2*; *er12-1*.  
722 (C-G) Expression patterns of EPFL2. Histone H2B fused TdTomato was used as a  
723 reporter. Developing pistil in stage 8 flower (C, D), and stage 9 flower (E, F). (G) A  
724 magnified view of a white box in (E). Transverse cross section (D, F) were obtained along  
725 the lines. v and r indicate valve and replum, respectively. Bar = 100  $\mu$ m. Student's t-test  
726 was used for the statistical analyses (A) and Tukey-Kramer's test was used for the  
727 statistical analyses (C, D). Different letters indicate significant difference ( $p < 0.005$ ).

728

729 **Figure 5. Disrupted regular patterning in ovule spacing in *epfl2* and ectopic**  
730 **expression of EPFL2**

731 (A, B) Ovule twinning phenotype in *epfl2-2*. (C-E) R2D2 expression in developing ovule  
732 primordia. Arrow heads indicate auxin maxima. (F, G) Expression pattern of *DRN* before  
733 acquiring ovule identity. (H, I) Expression pattern of *DRN* after arising ovule primordia.  
734 (J) Initiation of ovule primordia in wild-type (*pDRN::GFP*; Col) plants and (K) *epfl2*  
735 mutant (*pDRN::GFP*; *epfl2-2*) plants. (L) Quantification of cell number between ovule  
736 initial cells. Counted cells were indicated by dots in (J) and (K) as an example. F-test was

737 used for the statistical analysis. (M) Seed density (seed number/fruit length (mm))  
738 phenotype in *pDRN::EPFL2*; Col transgenic plants. Student's t-test was used for the  
739 statistical analysis. Different letters indicate significant difference ( $p < 0.005$ ). Scale bar =  
740 500  $\mu\text{m}$  (A, B), 50  $\mu\text{m}$  (C, D, E, F, H), 20  $\mu\text{m}$  (J, K).

741

742 **Figure 6. Coordination of fruit growth and ovule patterning by two**  
743 **peptide-receptor pairs**

744 (A) Graphical summary of expression patterns of EPFL2 (magenta) and EPFL9 (yellow).

745 (B) Two pathways control ovule initiation pattern and fruit growth to archive coordinated

746 fruit growth. (C) The interaction between EPFL2 (magenta) and auxin (green) establishes

747 regular ovule pattern in placenta.

748 **Supplementary Figures**

749 **Figure S1. Natural variation analysis on fruit length and seed number**

750 96 *Arabidopsis thaliana* natural accessions were analyzed on fruit length and seed number

751 per fruit at 16°C and 21°C. Each point indicates average values of fruit length and seed

752 number. Accessions in red points are presented in Figure 1B.

753

754 **Figure S2. Complementation of *L. er*, *Van-0* and *Hir-1* by functional ER genomic**  
755 **sequence**

756 (A) Fruit length phenotype. (B) Seed number per fruit. (C) Seed density. Student's t-test  
757 was used for the statistical analyses. Different letters indicate significant difference ( $p <$   
758 0.005).

759

760 **Figure S3. Fruit length and seed number in ER family receptor mutants**

761 (A) Fruit length (mm) and (B) seed number per fruit were analyzed in Columbia  
762 background mutants. Tukey-Kramer's test was used for the statistical analyses. Different  
763 letters indicate significant difference ( $p < 0.005$ ).

764

765 **Figure S4. Fruit phenotype of STOMAGEN RNAi plants**

766 (A) Fruit length (mm) and (B) seed number per fruit were analyzed. STOMAGEN RNAi  
767 plants were generated [17]. Student's t-test was used for the statistical analyses. Different  
768 letters indicate significant difference ( $p < 0.005$ ).



769

770 **Figure S5. Genetic interaction analysis between *er* and *epfl2* in Landsberg**

771 (A) Fruit length (mm) and (B) seed number per fruit were analyzed in Landsberg  
772 background mutants. L. *er* *ER*<sup>+</sup> was used as for wild-type plants. Tukey-Kramer's test  
773 was used for the statistical analyses. Different letters indicate significant difference ( $p <$   
774 0.005).

775

776 **Figure S6. Generation of *epfl2* knockout mutant in Col background by**  
777 **CRISPR/Cas9**

778 (A) Design of sgRNA. Boxes and lines indicate exons and introns, respectively. Green  
779 and white boxes indicate coding regions corresponding to mature peptide and 3'  
780 untranslated region (UTR), respectively. Arrowheads indicate the position of sgRNA1  
781 and sgRNA2. (B) Sequences of newly isolated *epfl2* mutant alleles. Black bars indicate  
782 the positions of sgRNA and red bars indicate the positions of protospacer adjacent motif  
783 (PAM), respectively. (C) Leaf margin phenotype of *epfl2* mutant alleles. Seventh true  
784 leaves were photographed according to [13]. Scale bars = 1 cm.

785

786 **Figure S7. Fruit phenotype of *epfl2* mutants**

787 (A) Fruit length (mm) and (B) seed number per fruit were analyzed. Student's t-test was  
788 used for the statistical analyses. Different letters indicate significant difference ( $p <$   
789 0.005).

790

791 **Figure S8. Genetic analysis of *epfl2* and ER family receptors: Fruit length and seed  
792 number phenotypes**

793 Double mutant analysis of *epfl2-2; er-105* in fruit length (A) and seed number per fruit  
794 (B). Triple mutant analysis of *epfl2-2; erl1-2; erl2-1* in fruit length (C) and seed number  
795 per fruit (D). Tukey-Kramer's test was used for the statistical analyses. Different letters  
796 indicate significant difference ( $p < 0.005$ ).

797

798 **Figure S9. Fruit phenotype of *pDRN::EPFL2* plants**

799 (A) Fruit length (mm) and (B) seed number per fruit were analysed. Student's t-test was  
800 used for the statistical analyses. Different letters indicate significant difference ( $p <$

801 0.005).

802

803 **Figure S10. Expression pattern of *TMM***

804 pTMM::GUS expression in stage 5-10 flower buds (A), stage 11 flower (B) and stage 12

805 flower (C). Scale bar = 2 mm.

806

807 **Figure S11. Evaluation of recombinant peptide bioactivity based on stomatal**

808 **density**

809 Representative images of epidermis after peptides and mock treatments in wild-type

810 (A-D) and *tmm-KO* mutant (E-H). Scale bar = 100  $\mu\text{m}$ . (I) Quantification of stomatal

811 number per 0.2  $\text{mm}^2$ . Each treatment were compared to mock treatment. Dunnett's test

812 was used for the statistical analyses. A value of  $p < 0.005$  was considered as significant.

813

814 **Figure S12. Quantitative interaction analyses between EPFLs and ER-family**

815 **receptors by using ITC**

816 Isothermal titration calorimetry of the ERECTA family receptor domains with EPFL2

817 (A-C) and EPFL9 (D-F). 18 injections of 2 $\mu$ L of peptide (50  $\mu$ M) were titrated into 280  
818  $\mu$ L of the receptor domain (5  $\mu$ M) at a stirring rate of 750 rpm. The experiment was  
819 performed at 25°C. The thermograms show the detected peaks of the heat change after  
820 each injection (upper panel), the integrated values were subjected to either the “one  
821 binding site” (A-E) fitting algorithm of the Microcal ITC-ORIGIN software, or the “two  
822 binding sites” algorithm (F). Each square represents the integrated value of the  
823 corresponding peak and the line resembles the yielded fitting curve after chi<sup>2</sup>  
824 minimization (lower panel). The table lists the calculated *Kd* values for each interaction  
825 with the theoretical stoichiometry (G).

826

827 **Supplemental Movie 1. Expression pattern of EPFL2 using two photon microscopy.**

828 A z series of stage 9-10 pistil expressing H2B:TdTomato under the control of EPFL2  
829 promoter. Images were acquired with 1  $\mu$ m intervals by using two photon microscopy  
830 (Nikon A1R) with 1000 nm excitation.

831

832 **Supplemental Movie 2. Expression pattern of EPFL2 using ClearSee and confocal**

833 **microscopy.**

834 A z series of ClearSee treated stage 9-10 pistil expressing H2B:TdTomato under the

835 control of EPFL2 promoter. Images were acquired with 1  $\mu\text{m}$  intervals by LSM880 with

836 561 nm excitation.

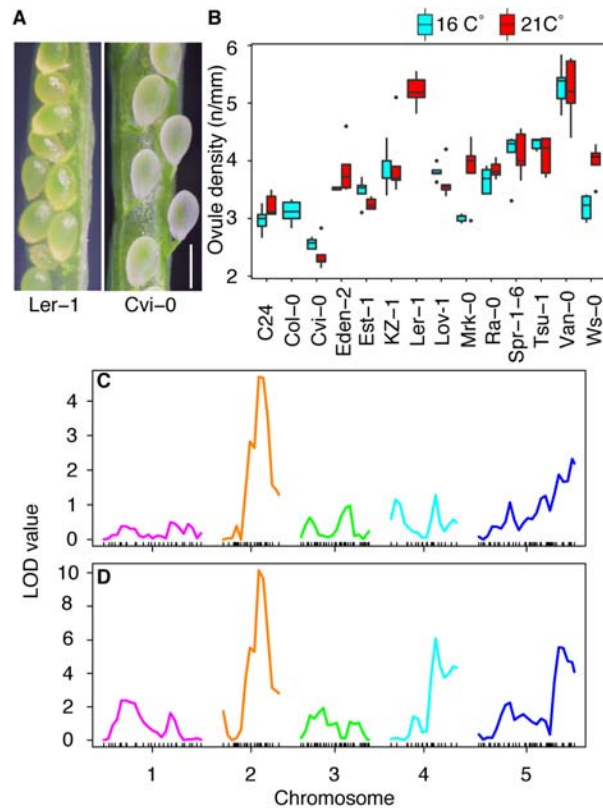

**Figure 1. Identification of responsible loci for the reproductive traits.** (A) Image of seed density in *L. er* (left) and *Cvi-0* (right). Bar = 1 mm. (B) Natural variation analysis on seed density (seed number/fruit length (mm)) phenotype at 16°C (cyan) and 21°C (red). Fourteen selected representative accessions are presented. See the supplementary figure 1 for the phenotype of all accessions. (C) QTL analysis using *L. er* x *Cvi-0* recombinant inbred lines [45]. (D) QTL re-analysis with ER as a cofactor. X and Y axes indicate chromosome position and LOD values, respectively.

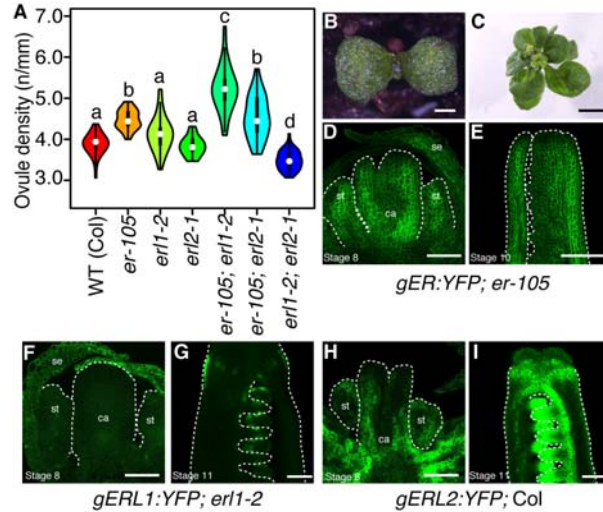

**Figure 2. Genetic and expression analysis of ER family receptors**

(A) Seed density (seed number/fruit length (mm)). 40 fruits were measured from 3 plants in each genotype. (B) Two weeks old *er-105; erl1-2; erl2-1* plant. (C) Six weeks old *er-105; erl1-2; erl2-1* plant. Expression patterns of ER, ERL1 and ERL2 in stage 8 flower (D, F, H) or later stage (E, G, I) of developing pistils. se, st, ca, v and r indicate sepals, stamens, carpels, valve, replum, respectively. (D, F, H) and (E, G, I) share same scales, respectively. Scale bar = 1 mm (B), 5 mm (C) and 50 μm (D, E, F, G, H, I). Tukey-Kramer's test was used for the statistical analysis. Different letters indicate significant difference ( $p < 0.005$ ).

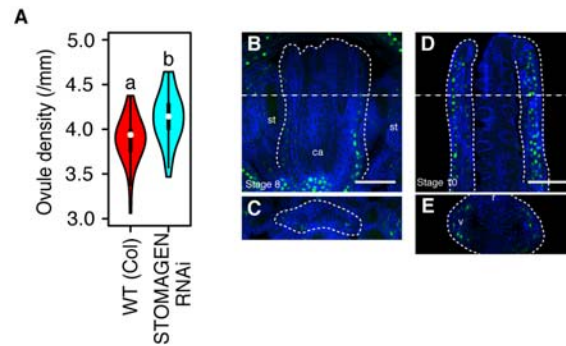

### Figure 3. Identification of EPFL9 as a potential ligand for ER

(A) Seed density (seed number/fruit length (mm)). 40 fruits were measured from 3 plants in each genotype. (B-E) Expression pattern of EPFL9 at stage 8 flower (B, C) and stage 9 flower (D, E). Transverse cross section (C, E) were obtained along the lines in (B) and (D). st, ca, v and r indicate sepals, stamens, carpels, valve, replum, respectively. Histone H2B fused EGFP was used as a reporter. Bar = 50  $\mu$ m. Student's t-test was used for the statistical analysis. Different letters indicate significant difference ( $p < 0.005$ ).



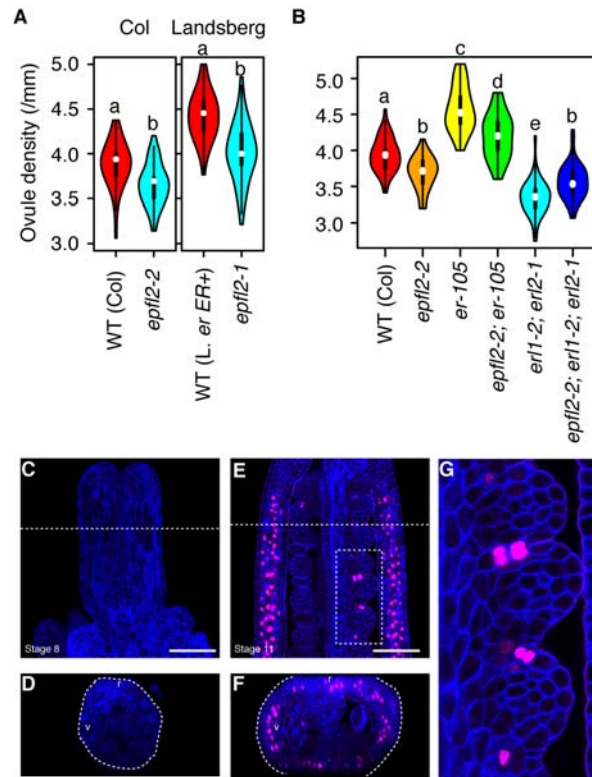

**Figure 4. Identification of EPFL2 as a patterning regulator of ovule initiation**

(A) Seed density (seed number/fruit length(mm)). 40 fruits were measured from 3 plants in each genotype. (B) Genetic interaction analysis either with *er-105* or *erl1-2; erl2-1*. (C-G) Expression patterns of EPFL2. Histone H2B fused TdTomato was used as a reporter. Developing pistil in stage 8 flower (C, D), and stage 9 flower (E, F). (G) A magnified view of a white box in (E). Transverse cross section (D, F) were obtained along the lines. v and r indicate valve and replum, respectively. Bar = 100  $\mu$ m. Student's t-test was used for the statistical analyses (A) and Tukey-Kramer's test was used for the statistical analyses (C, D). Different letters indicate significant difference ( $p < 0.005$ ).

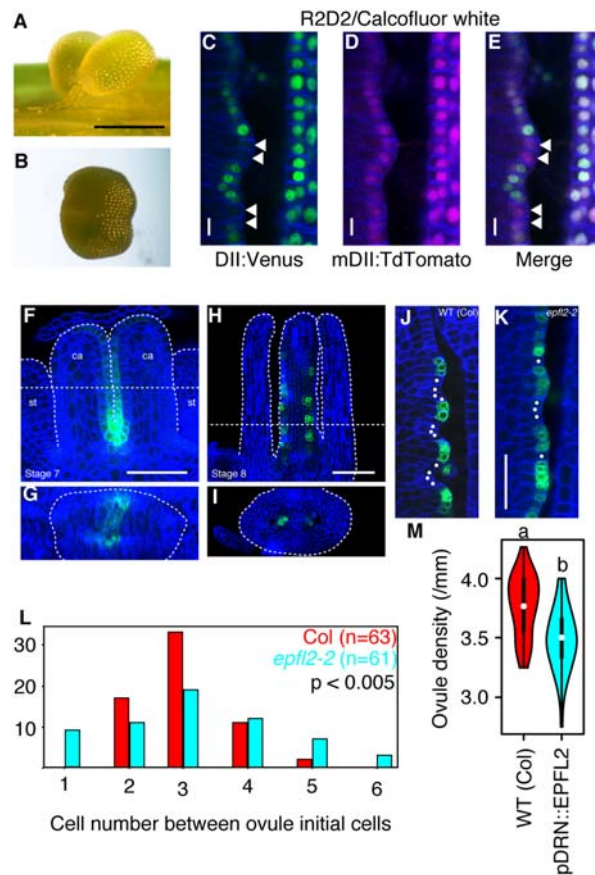

**Figure 5. Disrupted regular patterning in ovule spacing in *epfl2* and ectopic expression of EPFL2**

(A, B) Ovule twinning phenotype in *epfl2-2*. (C-E) R2D2 expression in developing ovule primordia. Arrow heads indicate auxin maxima. (F, G) Expression pattern of *DRN* before acquiring ovule identity. (H, I) Expression pattern of *DRN* after arising ovule primordia. (J) Initiation of ovule primordia in wild-type (*pDRN::GFP*; Col) plants and (K) *epfl2* mutant (*pDRN::GFP*; *epfl2-2*) plants. (L) Quantification of cell number between ovule initial cells. Counted cells were indicated by dots in (J) and (K) as an example. F-test was used for the statistical analysis. (M) Seed density (seed number/fruit length (mm)) phenotype in *pDRN::EPFL2*; Col transgenic plants. Student's t-test was used for the

statistical analysis. Different letters indicate significant difference ( $p < 0.005$ ). Scale bar =

500  $\mu\text{m}$  (A, B), 50  $\mu\text{m}$  (C, D, E, F, H), 20  $\mu\text{m}$  (J, K).

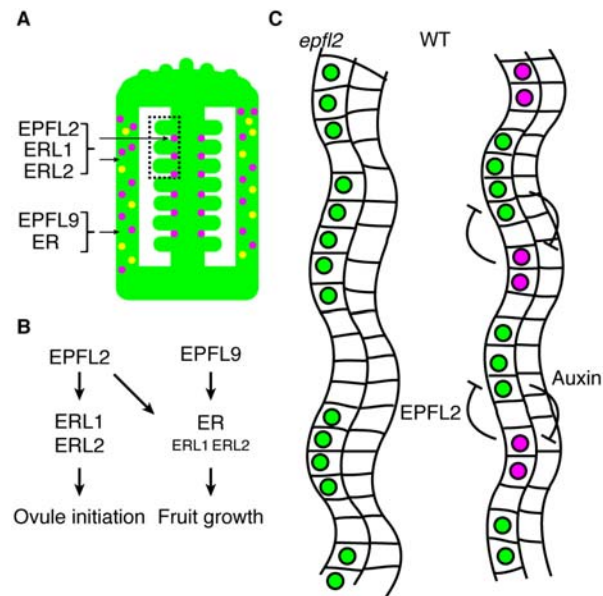

**Figure 6. Coordination of fruit growth and ovule patterning by two peptide-receptor pairs**

(A) Graphical summary of expression patterns of EPFL2 (magenta) and EPFL9 (yellow).  
(B) Two pathways control ovule initiation pattern and fruit growth to archive coordinated fruit growth. (C) The interaction between EPFL2 (magenta) and auxin (green) establishes regular ovule pattern in placenta.
